# Supplementary material for: Comparison of Adult Testis and Ovary MicroRNA Expression Profiles in Reeves’ Pond Turtles (Mauremys reevesii) With Temperature-Dependent Sex Determination
Source: Front Genet. 2020 Mar 2;11:133. doi: 10.3389/fgene.2020.00133 (PMC7061903; doi:10.3389/fgene.2020.00133)
Supplement: Supplementary Table 2 — Data filtering results. [file Table_2.xlsx]

## Sheet: Sheet1
Sample.ID	Total.Reads	Clean.Data	Percentage
Male 1	11965294	10143882	0.84
Male 2	19268984	15910350	0.82
Male 3	8852158	7812047	0.88
Female 1	10989442	9657812	0.87
Female 2	12196601	11058767	0.9
Female 3	17646067	16836764	0.95
