# Supplementary material for: Comparison of Adult Testis and Ovary MicroRNA Expression Profiles in Reeves’ Pond Turtles (Mauremys reevesii) With Temperature-Dependent Sex Determination
Source: Front Genet. 2020 Mar 2;11:133. doi: 10.3389/fgene.2020.00133 (PMC7061903; doi:10.3389/fgene.2020.00133)
Supplement: Supplementary Table 3 — The conserved miRNAs in M. reevesii. [file Table_3.xlsx]

## Sheet: Sheet1
miRNA family	miRNA name	Mature sequence (5' - 3')	Length	Homologous miRNA name	Homologous miRNA length	miRBase accession	Animal species
mir-15	mre-miR-16a-5p	UAGCAGCACGUAAAUAUUGG	20	aca-miR-16a-5p	20	MIMAT0021799	Anolis carolinensis
mir-148	mre-miR-148a-3p	UCAGUGCACUACAGAACUUUGU	22	cpi-miR-148a-3p	22	MIMAT0037783	Chrysemys picta
mir-196	mre-miR-196a	UAGGUAGUUUCAUGUUGUUGG	21	aca-miR-196a	21	MIMAT0021831	Anolis carolinensis
mir-138	mre-miR-138-5p	AGCUGGUGUUGUGAAUCAGGCCGU	24	cpi-miR-138-5p	21	MIMAT0037760	Chrysemys picta
mir-7911	mre-miR-2188-5p	AAGGUCCAACCUCACAUGUCCU	22	cpi-miR-2188-5p	22	MIMAT0037943	Chrysemys picta
mir-7911	mre-miR-124b-3p	UCAAGGUCCGCUGUGAACACGG	22	mmu-miR-124b-3p	22	MIMAT0049857	Mus musculus
mir-124	mre-miR-124-3p	UAAGGCACGCGGUGAAUGCC	20	mmu-miR-124-3p	20	MIMAT0000134	Mus musculus
mir-7911	mre-miR-456-3p	CAGGCUGGUUAGAUGGUUGUCA	22	cpi-miR-456-3p	22	MIMAT0037889	Chrysemys picta
let-7	mre-let-7e-5p	UGAGGUAGUAGAUUGAAUAGUU	22	cpi-let-7e-5p	22	MIMAT0037604	Chrysemys picta
let-7	mre-let-7a-5p	UGAGGUAGUAGGUUGUAUAGUU	22	cpi-let-7a-5p	22	MIMAT0037594	Chrysemys picta
mir-128	mre-miR-128-3p	UCACAGUGAACCGGUCUCUUU	21	cpi-miR-128-3p	21	MIMAT0037736	Chrysemys picta
mir-129	mre-miR-129-5p	CUUUUUGCGGUCUGGGCUUGC	21	cpi-miR-129-5p	21	MIMAT0037738	Chrysemys picta
mir-7911	mre-miR-9597-5p	AGAUCCUAAGACGUAUUUAGA	21	cpi-miR-9597-5p	21	MIMAT0037990	Chrysemys picta
mir-101	mre-miR-101-3p	UACAGUACUGUGAUAACUGAAG	22	cpi-miR-101-3p	22	MIMAT0037717	Chrysemys picta
mir-7911	mre-miR-1677h-3p	ACUAAAUUGGGAGAAGGGUUGA	22	cpi-miR-1677h-3p	22	MIMAT0037933	Chrysemys picta
mir-138	mre-miR-138-3p	GCUAUUUCACUACACCAGGGU	21	cpi-miR-138-3p	21	MIMAT0037761	Chrysemys picta
mir-1	mre-miR-1b-3p	UGGAAUGUUAAGAAGUAUGUAU	22	cpi-miR-1b-3p	22	MIMAT0037616	Chrysemys picta
mir-133	mre-miR-133c-3p	UUUGGUCCCCUUCAACCAGCUGC	23	cpi-miR-133c-3p	23	MIMAT0037753	Chrysemys picta
mir-30	mre-miR-30e-5p	UGUAAACAUCCUUGACUGGAAGCU	24	cpi-miR-30e-5p	24	MIMAT0037683	Chrysemys picta
mir-30	mre-miR-30c-5p	UGUAAACAUCCUACACUCUCAGC	23	aca-miR-30c-5p	23	MIMAT0021924	Anolis carolinensis
mir-551	mre-miR-551-3p	GCGACCCAUACUUGGUUUCA	20	cpi-miR-551-3p	22	MIMAT0037904	Chrysemys picta
mir-34	mre-miR-34a-5p	UGGCAGUGUCUUAGCUGGUUGU	22	cpi-miR-34a-5p	22	MIMAT0037692	Chrysemys picta
mir-8	mre-miR-200b-3p	UAAUACUGCCUGGUAAUGAUGAU	23	cpi-miR-200b-3p	23	MIMAT0037823	Chrysemys picta
mir-8	mre-miR-200a-3p	UAACACUGUCUGGUAACGAUGU	22	aca-miR-200a-3p	22	MIMAT0021845	Anolis carolinensis
mir-8	mre-miR-429-3p	UAAUACUGUCUGGUAAUGCCGU	22	cpi-miR-429-3p	22	MIMAT0037877	Chrysemys picta
